# Supplementary material for: Stool Phospholipid Signature is Altered by Diet and Tumors
Source: PubMed Central journal article supplement (PMC4254978; doi:10.1371/journal.pone.0114352), 2014-12-03
Supplement: pone.0114352.s003.pdf [file pone.0114352.s003.pdf]

Table S1 . Frequency of low abundance species in each group

| Name                                                                                     | <i>m/z</i> | Ctl diet no Tx | HFD no Tx | Ctl diet AOM-DSS | HFD AOM-DSS |
|------------------------------------------------------------------------------------------|------------|----------------|-----------|------------------|-------------|
| <b>Species found primarily in healthy control diet fed mice</b>                          |            |                |           |                  |             |
| PE-NMe2(O-16:0/O-16:0)                                                                   | 678.54     | 3/4            | 0/4       | 0/4              | 0/4         |
| <b>Species found primarily in healthy HFD fed mice</b>                                   |            |                |           |                  |             |
| PC(17:0/10:0)                                                                            | 663.85     | 0/4            | 3/4       | 1/4              | 2/6         |
| <b>Species found primarily in tumor bearing HFD fed mice</b>                             |            |                |           |                  |             |
| PC(10:0/19:0)                                                                            | 691.87     | 1/4            | 1/4       | 2/4              | 6/6         |
| PC(13:0/18:2(9Z,12Z))                                                                    | 715.78     | 1/4            | 1/4       | 2/4              | 5/6         |
| PC(14:0/18:3(9Z,12Z,15Z))                                                                | 727.21     | 0/4            | 1/4       | 1/4              | 6/6         |
| PC(16:0/26:0)                                                                            | 873.68     | 0/4            | 0/4       | 2/4              | 4/6         |
| PC(16:0/26:2(5Z,9Z))                                                                     | 869.62     | 0/4            | 1/4       | 2/4              | 4/6         |
| PC(16:0/5:0(COOH))                                                                       | 609.07     | 1/4            | 0/4       | 0/4              | 4/6         |
| PC(17:0/22:2(13Z,16Z))                                                                   | 827.24     | 1/4            | 1/4       | 2/4              | 6/6         |
| PC(18:0/11:1(10E))                                                                       | 689.87     | 1/4            | 0/4       | 1/4              | 6/6         |
| PC(19:0/22:1(11Z))                                                                       | 857.66     | 0/4            | 1/4       | 2/4              | 5/6         |
| PC(19:0/22:2(13Z,16Z))                                                                   | 855.72     | 1/4            | 1/4       | 2/4              | 5/6         |
| PC(20:0/22:4(7Z,10Z,13Z,16Z))                                                            | 865.85     | 0/4            | 0/4       | 1/4              | 4/6         |
| PC(20:0/22:5(7Z,10Z,13Z,16Z,19Z))                                                        | 863.39     | 0/4            | 0/4       | 2/4              | 5/6         |
| PC(21:0/22:2(13Z,16Z))                                                                   | 883.40     | 0/4            | 0/4       | 1/4              | 4/6         |
| PC(21:0/22:4(7Z,10Z,13Z,16Z))                                                            | 879.36     | 0/4            | 0/4       | 1/4              | 4/6         |
| <b>Species found primarily in healthy mice (both control diet and HFD)</b>               |            |                |           |                  |             |
| PI(18:1(9Z)/22:4(7Z,10Z,13Z,16Z))                                                        | 912.74     | 4/4            | 4/4       | 1/4              | 2/6         |
| <b>Species found primarily in tumor bearing mice (both control diet and HFD)</b>         |            |                |           |                  |             |
| PC(10:0/18:1(9Z))                                                                        | 677.32     | 0/4            | 1/4       | 2/4              | 4/6         |
| PC(16:0/5:0)                                                                             | 579.68     | 0/4            | 1/4       | 3/4              | 4/6         |
| <b>Species found primarily in control diet fed mice (both healthy and tumor-bearing)</b> |            |                |           |                  |             |
| none                                                                                     |            |                |           |                  |             |
| <b>Species found primarily in HFD fed mice (both healthy and tumor-bearing)</b>          |            |                |           |                  |             |
| none                                                                                     |            |                |           |                  |             |
