# Supplementary material for: Stool Phospholipid Signature is Altered by Diet and Tumors
Source: PubMed Central journal article supplement (PMC4254978; doi:10.1371/journal.pone.0114352), 2014-12-03
Supplement: pone.0114352.s004.pdf [file pone.0114352.s004.pdf]

Table S2. Low frequency species in a single group

| Name                                                            | <i>m/z</i> | Ctl diet no Tx | HFD no Tx | Ctl diet AOM-DSS | HFD AOM-DSS |
|-----------------------------------------------------------------|------------|----------------|-----------|------------------|-------------|
| <b>Species not found in healthy control diet fed mice</b>       |            |                |           |                  |             |
| PC(14:0/18:4(6Z,9Z,12Z,15Z))                                    | 725.59     | 1/4            | 3/4       | 3/4              | 4/6         |
| PC(13:0/20:4(5Z,8Z,11Z,14Z))                                    | 739.51     | 1/4            | 4/4       | 3/4              | 5/6         |
| PC(14:0/26:0)                                                   | 845.96     | 1/4            | 4/4       | 3/4              | 5/6         |
| PC(20:0/20:2(11Z,14Z))                                          | 841.62     | 1/4            | 3/4       | 3/4              | 5/6         |
| PC(16:0/20:5(5Z,8Z,11Z,14Z,17Z))                                | 779.53     | 1/4            | 4/4       | 3/4              | 6/6         |
| PC(16:1(9Z)/2:0)                                                | 535.44     | 1/4            | 3/4       | 3/4              | 4/6         |
| PC(20:3(8Z,11Z,14Z)/0:0)                                        | 545.36     | 1/4            | 2/4       | 3/4              | 6/6         |
| <b>Species not found in healthy HFD fed mice</b>                |            |                |           |                  |             |
| PC(13:0/20:3(8Z,11Z,14Z))                                       | 741.70     | 2/4            | 1/4       | 3/4              | 6/6         |
| PC(14:0/20:4(5Z,8Z,11Z,14Z))                                    | 753.77     | 3/4            | 1/4       | 3/4              | 5/6         |
| PI(19:0/21:0)                                                   | 922.50     | 4/4            | 1/4       | 3/4              | 4/6         |
| PI(19:0/22:2(13Z,16Z))                                          | 932.69     | 3/4            | 1/4       | 3/4              | 5/6         |
| <b>Species not found in tumor bearing control diet fed mice</b> |            |                |           |                  |             |
| PC(18:0/22:3(10Z,13Z,16Z))                                      | 839.62     | 3/4            | 3/4       | 1/4              | 5/6         |
| <b>Species not found in tumor bearing HFD fed mice</b>          |            |                |           |                  |             |
| PI(21:0/22:2(13Z,16Z))                                          | 960.68     | 4/4            | 3/4       | 3/4              | 1/6         |
| PI(14:1(9Z)/22:4(7Z,10Z,13Z,16Z))                               | 856.46     | 3/4            | 3/4       | 2/4              | 2/6         |
| PI(20:2(11Z,14Z)/0:0)                                           | 624.44     | 4/4            | 4/4       | 4/4              | 2/6         |
